# Supplementary material for: Cellular age explains variation in age-related cell-to-cell transcriptome variability
Source: HighWire-hosted journal article supplement (doi:10.1101/gr.278144.123), 2023-11-01
Supplement: Supplemental_Table_S2.xlsx [file Supplemental_Table_S2.xlsx]

## Sheet: TableS2
Supplemental Table S2. Change in cellular age in young and old mice and change in transcriptome variability measured by different metrics.
cell type annotation in TMS	cell type annotation in Sender and Milo 2021	lifespan estimation status	lifespan.used.in.this.study (day)	mean cell age at 3-month (in days)	mean cell age at 24-month (in days)	change in cell age (day) between old and young mice	change in transcriptome variability (beta_age)	change in transcriptome variability (1-spearman's rho)	change in transcriptome variability (1-GCL)
Heart:monocyte	Blood:Monocytes	tissue-specific estimate	0.9	0.490742	0.490742	1.66533e-15	0.00785315	0.0171301	0.011301
Large_Intestine:epithelial cell of large intestine	Large intestine:Colon epithelial cells	tissue-specific estimate	2.7	2.23076	2.23079	3.334e-05	0.00658751	0.0235191	1.14497
Thymus:DN4 thymocyte	Blood:thymocytes	non tissue-specific estimate	3.8	3.32067	3.3219	0.00123807	0.000113519	-0.0641846	-0.88065
Thymus:thymocyte	Blood:thymocytes	non tissue-specific estimate	3.8	3.32067	3.3219	0.00123807	-0.00970878	-0.244217	-1.53649
Large_Intestine:large intestine goblet cell	Large intestine:large intestine goblet cell	tissue-specific estimate	5	4.50546	4.51666	0.0111957	0.00442517	-0.115028	-1.10162
Skin:epidermal cell	Skin:Epidermal cells	tissue-specific estimate	10	9.03494	9.50833	0.473392	0.00707668	0.0192254	0.265629
Marrow:macrophage	Spleen:macrophage	non tissue-specific estimate	11.1111	9.90498	10.6186	0.713629	0.0048622	0.00521346	0.373504
Trachea:macrophage	Spleen:macrophage	non tissue-specific estimate	11.1111	9.90498	10.6186	0.713629	0.00632299	0.0611558	0.0646863
Pancreas:pancreatic acinar cell	Pancreas:acinar cell	tissue-specific estimate	31	18.9135	30.5027	11.5892	0.00258101	0.0954008	-0.0209535
BAT:B cell	Blood:mature B cells	non tissue-specific estimate	40	20.8426	39.5021	18.6595	0.0119786	0.0278384	0.158718
MAT:B cell	Blood:mature B cells	non tissue-specific estimate	40	20.8426	39.5021	18.6595	0.00492332	0.0169902	0.200226
SCAT:B cell	Blood:mature B cells	non tissue-specific estimate	40	20.8426	39.5021	18.6595	-2.3663e-05	0.00503743	0.233198
Spleen:B cell	Blood:mature B cells	non tissue-specific estimate	40	20.8426	39.5021	18.6595	-0.00162162	-0.0668534	-0.517228
Pancreas:pancreatic A cell	Pancreas:Islet cells	non tissue-specific estimate	60	23.412	59.5004	36.0884	0.00495102	-0.0209285	0.609128
Pancreas:pancreatic B cell	Pancreas:Islet cells	non tissue-specific estimate	60	23.412	59.5004	36.0884	0.0106054	0.0525661	0.321542
Liver:endothelial cell of hepatic sinusoid	Liver:endothelial cell of hepatic sinusoid	tissue-specific estimate	67.2808	24.0247	66.7783	42.7537	0.00370849	0.00136131	-0.385692
Marrow:mature alpha-beta T cell	Blood:mature T cells	non tissue-specific estimate	70	24.2254	69.4956	45.2702	0.0127796	-0.0100713	0.234553
Marrow:NK cell	Blood:mature T cells	non tissue-specific estimate	70	24.2254	69.4956	45.2702	0.0171274	0.00629535	0.156138
Spleen:CD4-positive, alpha-beta T cell	Blood:mature T cells	non tissue-specific estimate	70	24.2254	69.4956	45.2702	0.00243978	0.00216304	-0.137403
Spleen:CD8-positive, alpha-beta T cell	Blood:mature T cells	non tissue-specific estimate	70	24.2254	69.4956	45.2702	0.00117058	-0.0451539	-0.447949
Heart:endothelial cell of coronary artery	Heart:endothelial cell	tissue-specific estimate	168.434	27.3986	164.598	137.199	0.00983227	0.0269203	0.013787
Trachea:fibroblast	Aorta:fibroblast	tissue-specific estimate	250	28.2134	231.696	203.482	0.014277	0.0277472	0.8286
Aorta:aortic endothelial cell	Vessels:Endothelial cells	non tissue-specific estimate	300	28.5012	266.315	237.813	0.00938623	0.0454438	0.597518
BAT:endothelial cell	Vessels:Endothelial cells	non tissue-specific estimate	300	28.5012	266.315	237.813	0.00514479	0.00658101	0.467086
Diaphragm:endothelial cell	Vessels:Endothelial cells	non tissue-specific estimate	300	28.5012	266.315	237.813	0.00907141	0.0535133	0.46978
GAT:endothelial cell	Vessels:Endothelial cells	non tissue-specific estimate	300	28.5012	266.315	237.813	0.0117595	-0.00887135	0.232534
MAT:endothelial cell	Vessels:Endothelial cells	non tissue-specific estimate	300	28.5012	266.315	237.813	0.00430985	0.0298489	0.454209
Pancreas:endothelial cell	Vessels:Endothelial cells	non tissue-specific estimate	300	28.5012	266.315	237.813	0.00559006	0.0726734	0.358178
SCAT:endothelial cell	Vessels:Endothelial cells	non tissue-specific estimate	300	28.5012	266.315	237.813	0.0123416	0.082844	0.838591
Trachea:endothelial cell	Vessels:Endothelial cells	non tissue-specific estimate	300	28.5012	266.315	237.813	0.0145106	0.12112	0.769933
Liver:hepatocyte	Liver:Hepatocytes	tissue-specific estimate	400	28.8665	322.776	293.91	0.0102043	0.105757	1.2828
Brain_Non-Myeloid:endothelial cell	Brain:endothelial cell	tissue-specific estimate	560.027	29.1846	387.341	358.156	0.0147374	0.0405744	0.665622
Brain_Myeloid:microglial cell	Brain:microglial cell	tissue-specific estimate	650	29.2957	414.21	384.915	0.00875364	0.0303386	0.310822
Limb_Muscle:endothelial cell	Muscle:endothelial cell	tissue-specific estimate	781.225	29.4125	445.301	415.888	0.0148388	0.00387112	-0.0259377
Diaphragm:skeletal muscle satellite cell	Skeletal Muscle:Satellite cells	non tissue-specific estimate	1000	29.5397	482.907	453.367	0.0133246	-0.0394435	0.508295
Limb_Muscle:skeletal muscle satellite cell	Skeletal Muscle:Satellite cells	non tissue-specific estimate	1000	29.5397	482.907	453.367	0.0181243	-0.00714713	-0.843331
Brain_Non-Myeloid:oligodendrocyte	Brain:oligodendrocyte	tissue-specific estimate	1250	29.631	512.566	482.935	0.0127874	0.0156705	1.54551
Heart:atrial myocyte	Heart:Cardiomyocytes	tissue-specific estimate	12166.7	29.9618	642.392	612.43	0.00606431	0.081261	0.342978
Brain_Non-Myeloid:neuron	Nervous system:Neurons	tissue-specific estimate	292000	29.9984	659.254	629.255	0.0298077	0.153765	0.774114
