# Supplementary figures and images for: Cellular age explains variation in age-related cell-to-cell transcriptome variability
Source: HighWire-hosted journal article supplement (doi:10.1101/gr.278144.123), 2023-11-01

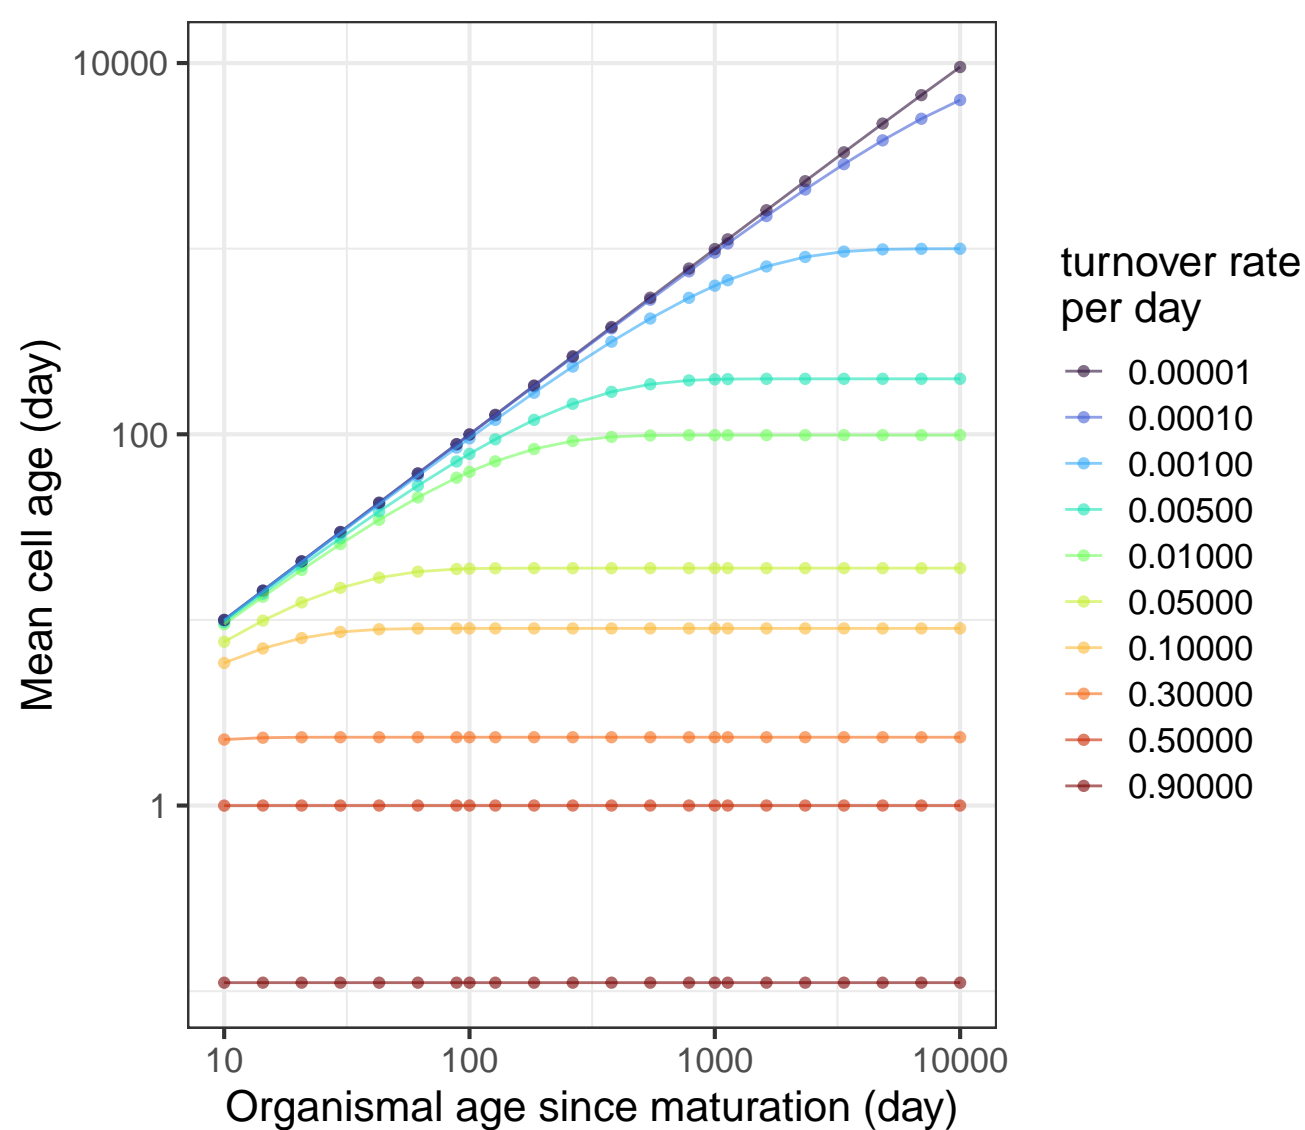

Supplement: Supplemental_Code.zip [file cal_mean.cell.age.pdf › Supplemental_Code/cell_demography_model/cal_mean.cell.age.pdf]

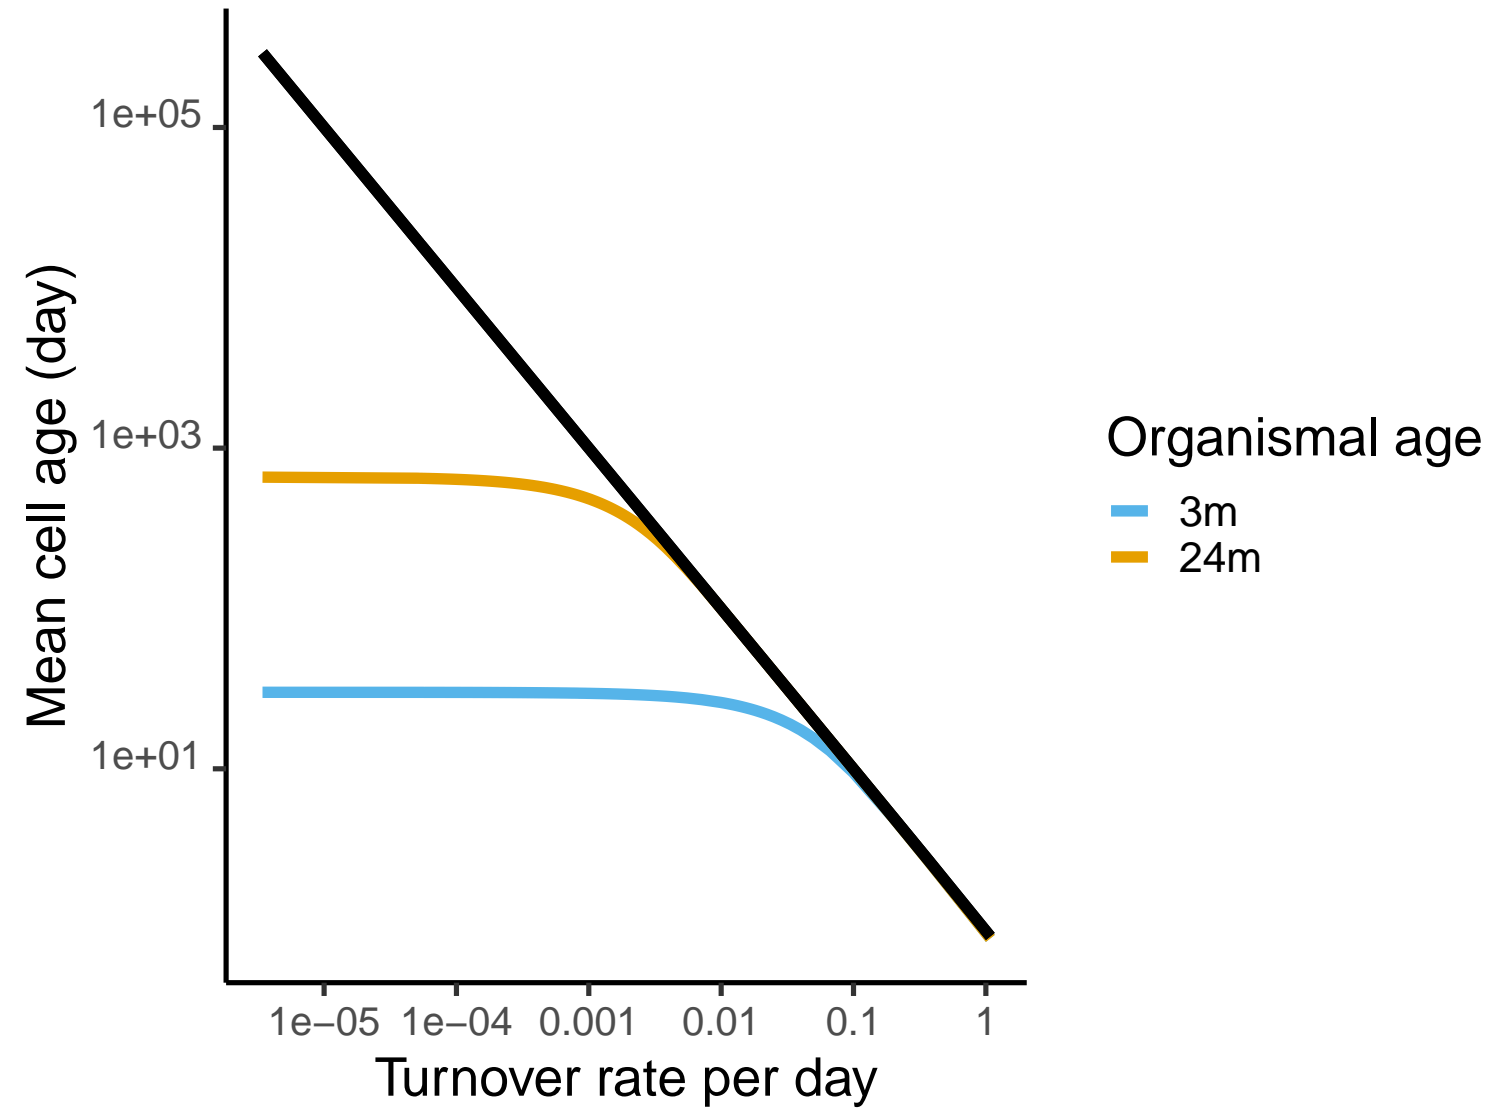

Supplement: Supplemental_Code.zip [file mean.cell.age_truncated_expo_smooth.pdf › Supplemental_Code/cell_demography_model/mean.cell.age_truncated_expo_smooth.pdf]

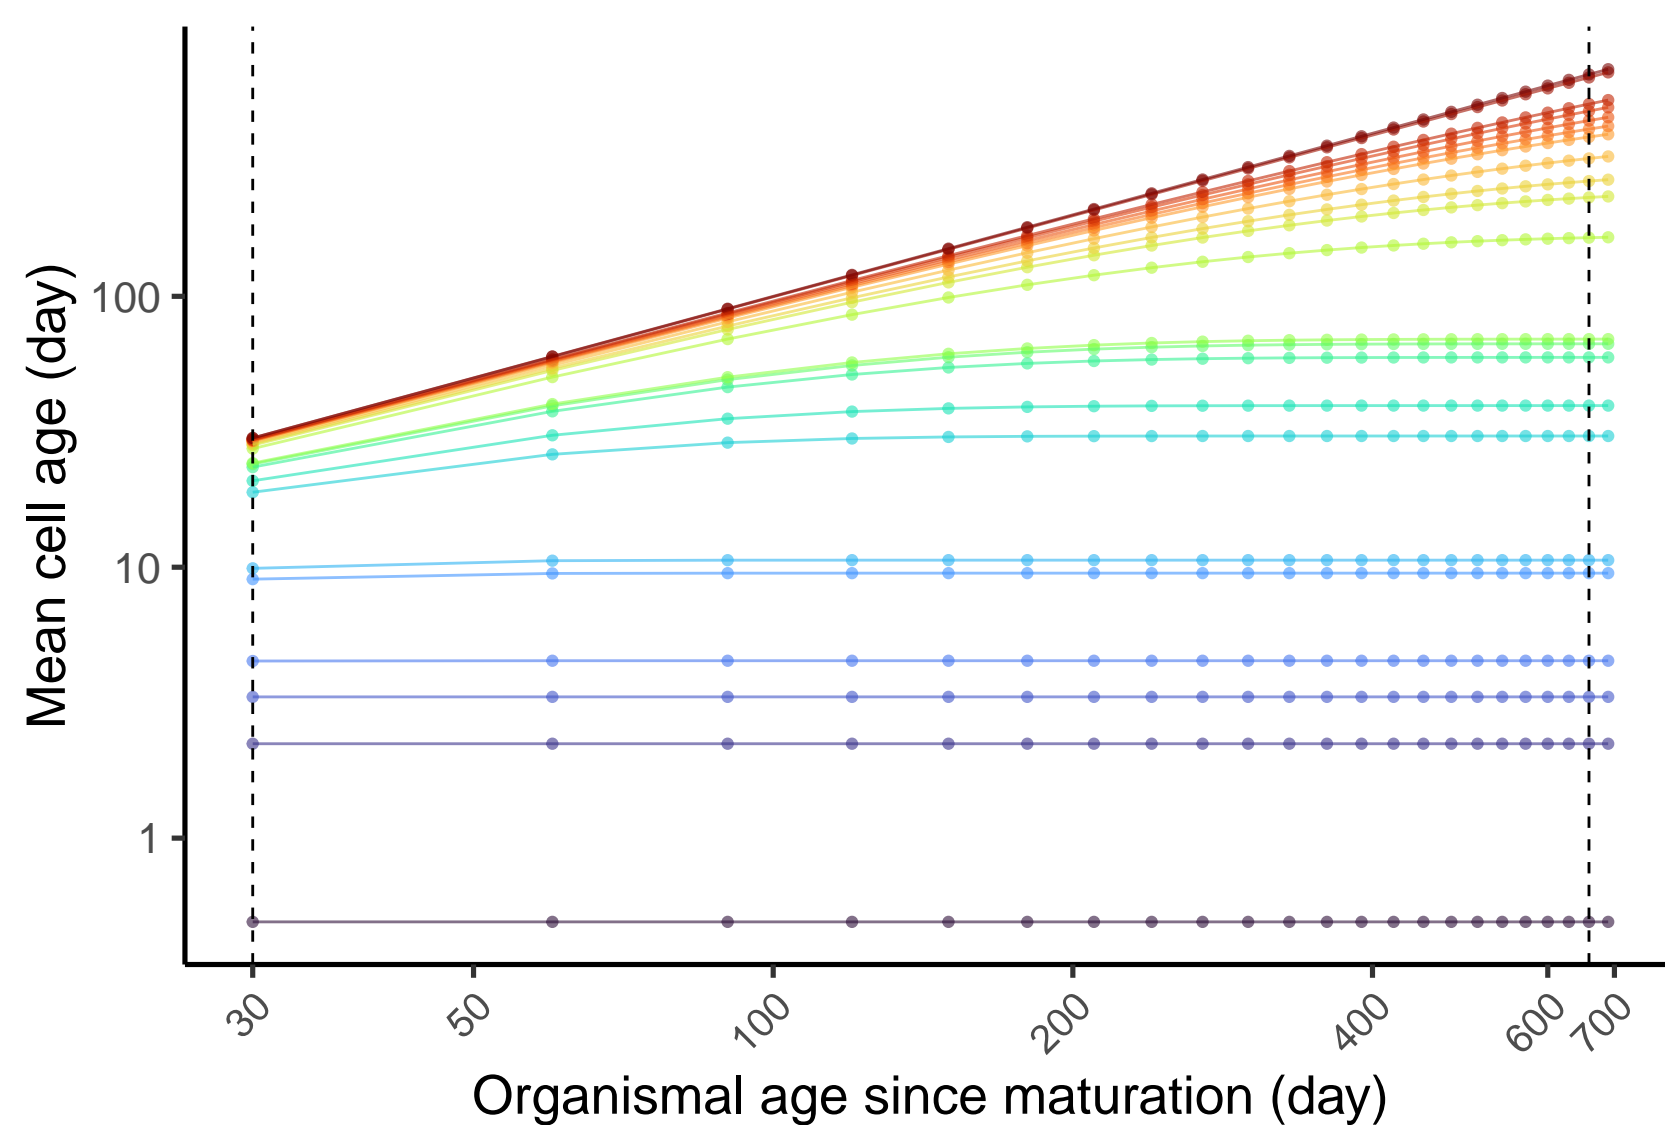

Supplement: Supplemental_Code.zip [file plug_in_Rcal_mean_var_N0F.pdf › Supplemental_Code/cell_demography_model/plug_in_Rcal_mean_var_N0F.pdf]

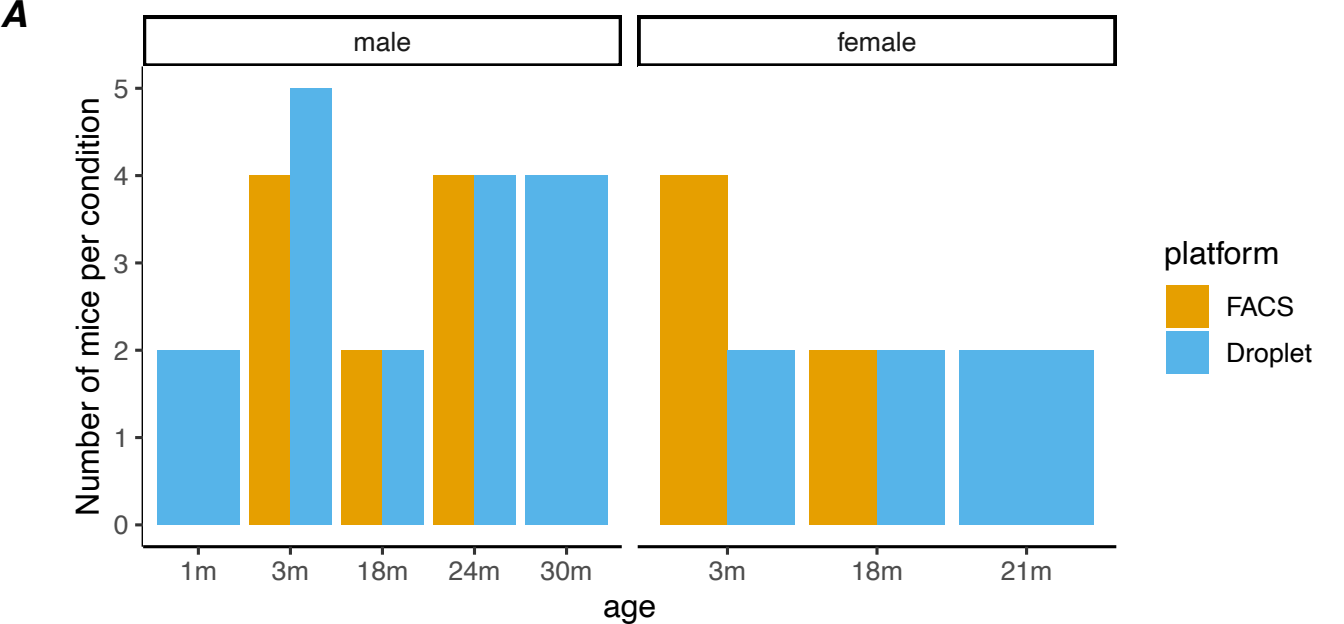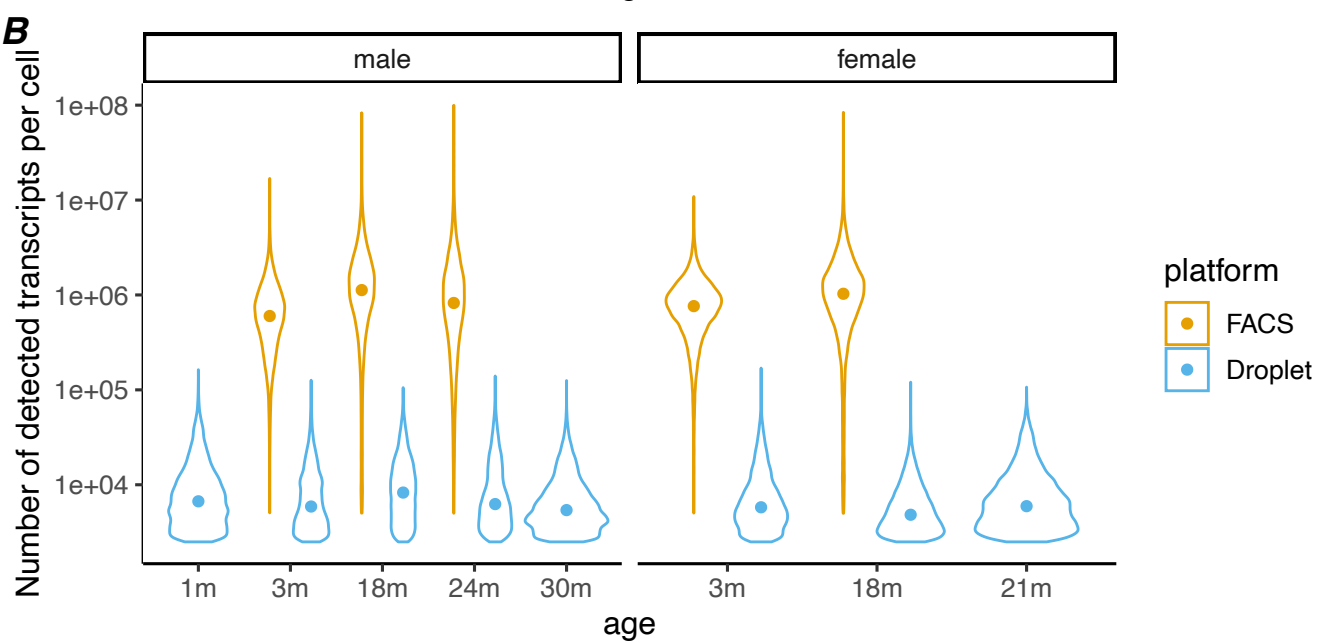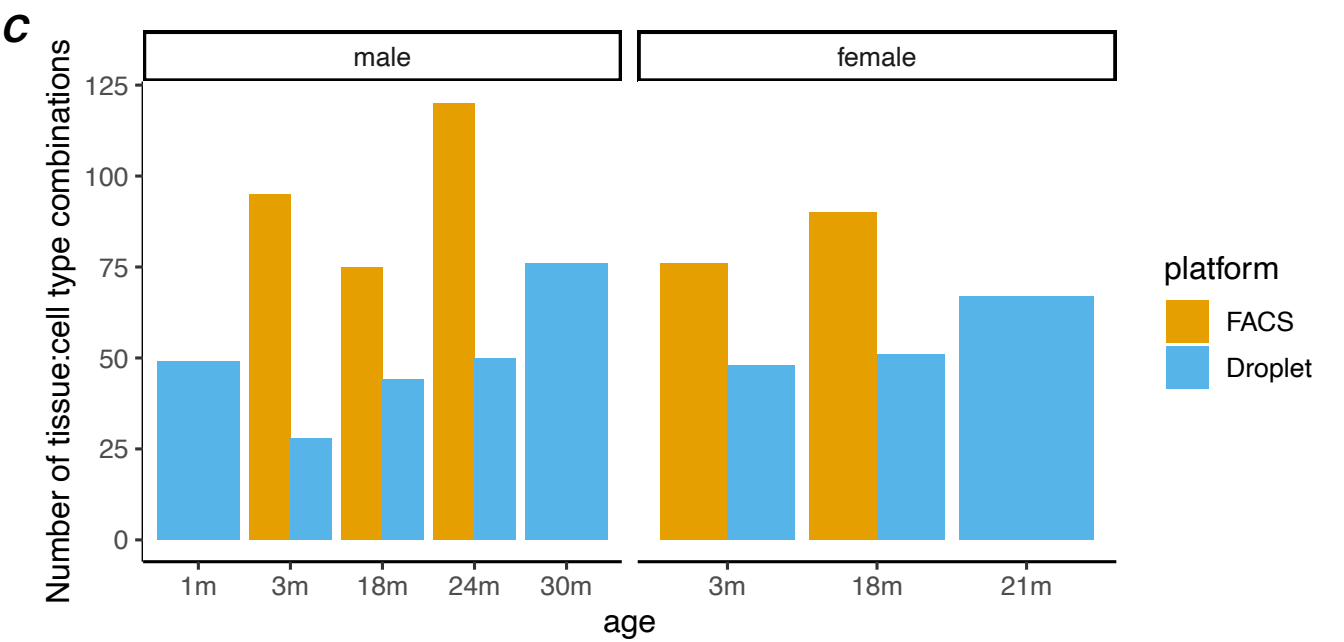

Supplement: Supplemental_Code.zip [file compare_facs_droplet.pdf › Supplemental_Code/src/compare_facs_droplet.pdf]
